# Supplementary material for: Cation exchange synthesis of CuInxGa1−xSe2 nanowires and their implementation in photovoltaic devices
Source: Royal Society of Chemistry journal article supplement (doi:10.1039/c9ra04605d), 2019-01-01
Supplement: c9ra04605d1.pdf [file c9ra04605d1.pdf]

## Cation Exchange Synthesis of $\text{CuIn}_x\text{Ga}_{1-x}\text{Se}_2$ Nanowires and Their Implementation in Photovoltaic Devices†

Kun Wang, ‡<sup>a</sup> Guanwei Jia, ‡<sup>b</sup> Baokun Liu,<sup>a</sup> Peixu Yang,<sup>a</sup> Jinhui Liu,<sup>a</sup> Weidong Zhang,<sup>a</sup> Rongbin Li,<sup>c</sup> Chengduo Wang,<sup>a</sup> Shaojun Zhang<sup>a</sup> and Jiang Du,<sup>\*a, d</sup>

a. Henan Province Industrial Technology Research Institute of Resources and Materials, Zhengzhou University, Zhengzhou 450001, China.

b. School of Physics and Electronics, Henan University, Kaifeng 475004, China.

c. School of metallurgical and Ecological Engineering, University of Science and Technology Beijing, Beijing 100083, China.

d. Department of Chemical Engineering, Texas Materials Institute, Center for Nano- and Molecular Science and Technology, The University of Texas at Austin, Austin, TX 78712, USA.

† Electronic Supplementary Information (ESI) available: See DOI: 10.1039/x0xx00000x

‡ These authors contributed equally to this work.

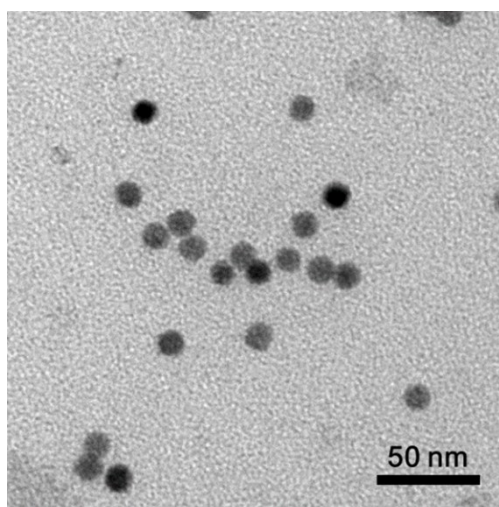

Fig. S1 Bi nanoparticles used for the synthesis of  $\text{CuInSe}_2$  nanowires.

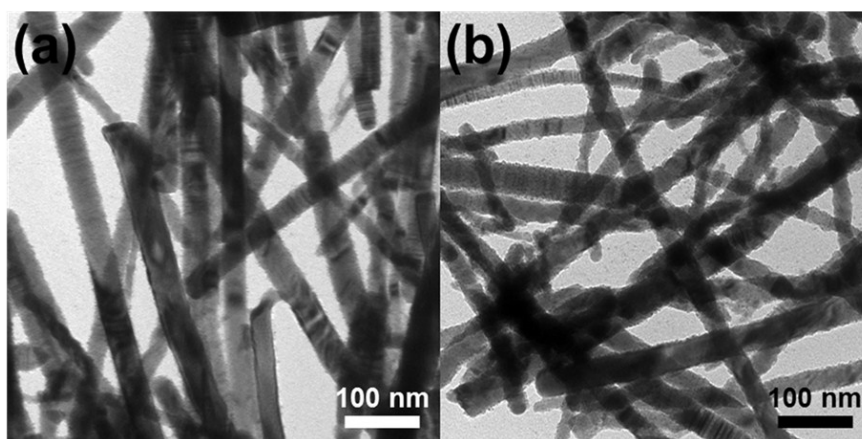

Fig. S2 TEM images of (a) CuIn<sub>0.98</sub>Ga<sub>0.02</sub>Se<sub>2</sub> nanowires and (b) CuIn<sub>0.89</sub>Ga<sub>0.11</sub>Se<sub>2</sub> nanowires

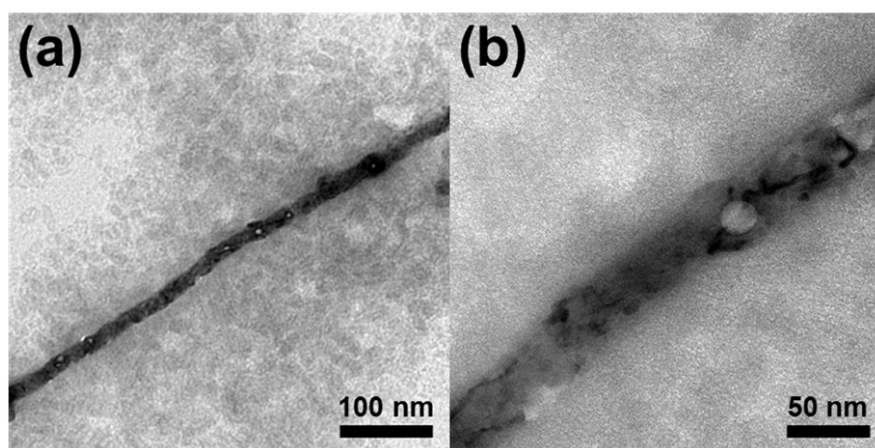

Fig. S3 TEM images of the product when the Ga/CuInSe<sub>2</sub> mole ratio in the reaction mixture is 8:1

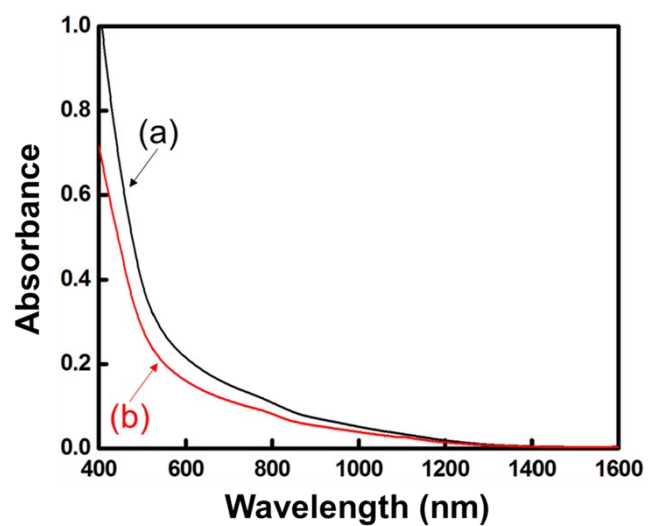

Fig. S4 Room temperature absorbance spectra of (a) CuIn<sub>0.98</sub>Ga<sub>0.02</sub>Se<sub>2</sub> nanowires and (b) CuIn<sub>0.89</sub>Ga<sub>0.11</sub>Se<sub>2</sub> nanowires dispersed in toluene.
